RESEARCH ARTICLE

# The First Dinosaur from Washington State and a Review of Pacific Coast Dinosaurs from North America

Brandon R. Peacock<sup>1,2</sup>, Christian A. Sidor<sup>1,2</sup>\*

**1** Department of Biology, University of Washington, Seattle, Washington, United States of America, **2** Burke Museum, University of Washington, Seattle, Washington, United States of America

☞ These authors contributed equally to this work.

\* [casidor@uw.edu](mailto:casidor@uw.edu)

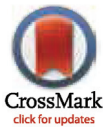

**OPEN ACCESS**

**Citation:** Peacock BR, Sidor CA (2015) The First Dinosaur from Washington State and a Review of Pacific Coast Dinosaurs from North America. PLoS ONE 10(5): e0127792. doi:10.1371/journal.pone.0127792

**Academic Editor:** David C. Evans, Royal Ontario Museum, CANADA

**Received:** February 24, 2015

**Accepted:** April 18, 2015

**Published:** May 20, 2015

**Copyright:** © 2015 Peacock, Sidor. This is an open access article distributed under the terms of the [Creative Commons Attribution License](https://creativecommons.org/licenses/by/4.0/), which permits unrestricted use, distribution, and reproduction in any medium, provided the original author and source are credited.

**Data Availability Statement:** All relevant data are within the paper. The specimen described is housed at the University of Washington Burke Museum.

**Funding:** The University of Washington Burke Museum provided funding for this research. The funders had no role in study design, data collection and analysis, decision to publish, or preparation of the manuscript.

**Competing Interests:** The authors have declared that no competing interests exist.

## Abstract

We describe the first diagnostic dinosaur fossil from Washington State. The specimen, which consists of a proximal left femur, was recovered from the shallow marine rocks of the Upper Cretaceous (Campanian) Cedar District Formation (Nanaimo Group) and is interpreted as pertaining to a large theropod on the basis of its hollow medullary cavity and proximally placed fourth trochanter. The Washington theropod represents one of the northernmost occurrences of a Mesozoic dinosaur on the west coast of the United States and one of only a handful from the Pacific coast of Laramidia during the Cretaceous. Its isolated nature and preservation in marine rocks suggest that the element was washed in from a nearby fluvial system. If the femur pertains to a tyrannosauroid, which seems likely given its size and the widespread occurrence of the group across Laramidia during Late Cretaceous times, then it would represent an earlier occurrence of large body size than previously recognized (complete femur length estimated at 1.2 meters). Uncertainty surrounding the latitude of deposition of the Nanaimo Group (i.e., the Baja-British Columbia hypothesis) precludes assigning the Washington theropod to either of the putative northern or southern biogeographic provinces of Laramidia.

## Introduction

The Late Cretaceous was a time of remarkably high dinosaur diversity worldwide, but especially so in North America [1, 2]. During the Cretaceous, a shallow inland sea separated North America into two large landmasses, Appalachia to the east and Laramidia to the west (Fig 1), with the bulk of dinosaurs recorded from non-marine rocks that were deposited along the eastern margin of Laramidia [3]. The dinosaurs of Laramidia have been considered to form two biogeographic provinces, a northern one represented by the rich fossil record of Montana and Alberta, and a more poorly understood southern province including localities in Utah, New Mexico, Texas, and Coahuila [3–6], but the reality of these provinces has been challenged [7]. In addition, several important dinosaur finds have been made in the marine rocks that

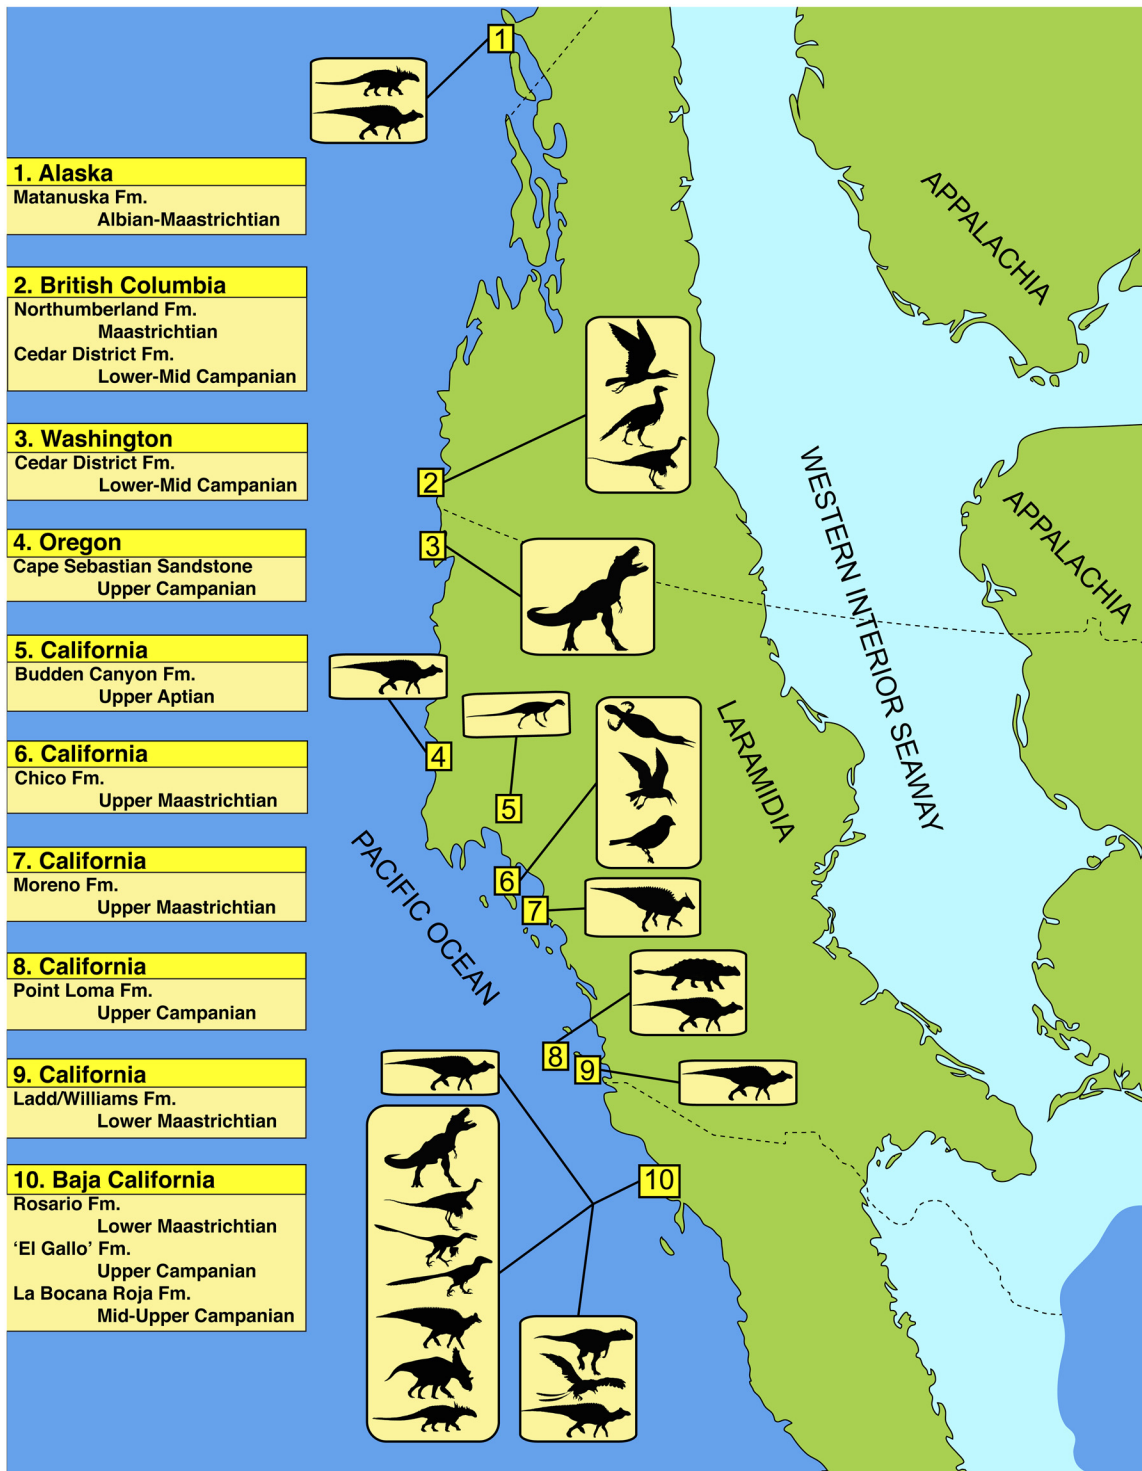

**Fig 1. Geographic overview of Late Cretaceous dinosaur assemblages from the west coast of Laramidia.** The specimen described here was collected from Campanian rocks at Sucia Island (Washington State), but these strata were probably deposited at a more southern latitude, perhaps as far south as the 'El Gallo' and La Bocana Roja formations of Baja California, Mexico. See Discussion for overview of specific taxa from each formation. Dinosaur assemblage data were gathered from the following sources: Matanuska Formation [13–15], Northumberland Formation [16, 17], Cedar District Formation [16], Cape Sebastian Sandstone [2, 18], Chico Formation [19, 20], Budden Canyon Formation [21], Moreno Formation [22, 23], Point Loma Formation [24–26], Ladd Formation [2], Rosario Formation [6], 'El Gallo' Formation [6, 22, 27–32], La Bocana Roja Formation [33, 34]. Silhouettes modified from images available on Wikimedia Commons.

doi:10.1371/journal.pone.0127792.g001

represent deposition within the Western Interior Seaway itself (e.g., Bear Paw Shale Formation, Niobrara Chalk Formation, etc. [8–12]).

Compared to the areas in and around the Western Interior Seaway, relatively little is known about vertebrate assemblages, including dinosaurs, from the Pacific coast of Laramidia. Factors such as its active tectonic margin and high degree of human development have likely conspired to diminish the opportunity for paleontologists to make comparable discoveries. Most of the dinosaurian material from the Pacific coast comes from two formations in Baja California, México and pertains to hadrosaurid, ceratopsian, and ankylosaurian ornithischians, as well as many lineages of theropod saurischians, including tyrannosaurids, ornithomimids, dromaeosaurids, troodontids, and an enantiornithine bird [22, 27–31, 33–35]. Isolated skeletons and bones of ankylosaurian and hadrosaurian dinosaurs have been discovered in coastal or marine Cretaceous rocks in Oregon and California [2, 19, 20, 24, 26, 36], including the nodosaurid ankylosaur, *Aletopelta coombsi* [25] and the saurolophine hadrosaurid, *Augustynolophus morrisoni* [23]. Enantiornithine and ornithurine birds are known from coastal British Columbia [17]. A single partial skull of the ankylosaur *Edmontonia* and postcranial elements of a hadrosaur were described from the marine Matanuska Formation of south-central Alaska [13–15]. Here we describe the first dinosaur from Washington State and add a new geographic record for Campanian theropods from the west coast of North America.

## Methods

The fossil described herein, UWBM 95770, is housed in the paleontology collections at the University of Washington Burke Museum (Seattle, Washington). It was collected under Sucia Island State Park research permit #080603. Locality information is available to qualified researchers. The authors gathered comparative measurement data at the Royal Tyrrell Museum of Palaeontology (TMP; Drumheller, Alberta, Canada) with permission of the relevant curator. The relevant specimens measured are listed in Table 1 (TMP 1981.000.0028, TMP 1986.205.0001, TMP 2001.036.0001, TMP 1982.013.0030, TMP 1986.205.0001, TMP 1981.010.0001, TMP 1994.012.0602, TMP 1993.115.0001, TMP 1993.115.0001, TMP 1967.014.0038, TMP 1994.036.0500, TMP 1995.038.0001, TMP 1979.020.0001, TMP 2001.000.0014, TMP 2004.003.0007, TMP 2000.050.0006).

## Geological Setting

Rocks of the Nanaimo Group crop out on Vancouver Island and the Gulf Islands of Canada as well as the nearby San Juan Islands of Washington State [37]. They range from Santonian to Maastrichtian, have been subdivided into 11 formations, and host a diverse invertebrate fossil record including ammonites, baculitids, and inoceramid bivalves upon which a regional biostratigraphy has been developed [38–43]. The Cedar District Formation, which lies near the middle of the Nanaimo Group, was interpreted at Sucia Island as representing a shallow marine shelf facies by Ward et al. [41]. Elsewhere the formation includes shales, turbidites, and conglomeratic units that can be difficult to correlate between outcrops scattered within the San Juan Islands and elsewhere [40].

At Sucia Island, the Cedar District Formation has been correlated to the upper part of the chron 33r interval and spans the *Hoplitoplacenticerans vancouverense* and *Baculites inornatus* range zones [41, 44]. Haggart et al. [45] considered the Cedar District Formation to be upper Campanian, whereas Ward et al. [41], who used an updated biostratigraphy, as well as magnetostratigraphic and preliminary strontium isotopic data, considered it lower middle Campanian (~80 Ma). The paleolatitude at which the Nanaimo Group was deposited is contentious, with advocates of the Baja—British Columbia hypothesis suggesting a paleolatitude of

**Table 1. Linear measurements from selected theropod dinosaur femora.**

| Taxon                             | Specimen          | Side  | Proximal width | Length       |
|-----------------------------------|-------------------|-------|----------------|--------------|
| <i>Tyrannosaurus rex</i>          | TMP 1981.000.0028 | left  | 280            | 1310         |
| Theropoda indet.                  | UWBM 95770        | left  | 214            | <b>1167*</b> |
| <i>Albertosaurus sarcophagus</i>  | TMP 1986.205.0001 | right | 130            | 1035         |
| <i>Daspletosaurus torosus</i>     | TMP 2001.036.0001 | left  | 203            | 987          |
| Tyrannosauridae indet.            | TMP 1982.013.0030 | left  | 211            | 985          |
| <i>Albertosaurus sarcophagus</i>  | TMP 1986.205.0001 | left  | 140            | 980          |
| <i>Albertosaurus sarcophagus</i>  | TMP 1981.010.0001 | left  | 166            | 928          |
| <i>Gorgosaurus libratus</i>       | TMP 1994.012.0602 | right | 179            | 915          |
| <i>Sinraptor dongi</i>            | TMP 1993.115.0001 | left  | 142            | 855          |
| <i>Sinraptor dongi</i>            | TMP 1993.115.0001 | right | 145            | 850          |
| ?Tyrannosauridae                  | TMP 1967.014.0038 | left  | 106            | 704          |
| <i>Gorgosaurus libratus</i>       | TMP 1994.036.0500 | right | 86             | 635          |
| Dromaeosaur indet.                | TMP 1995.038.0001 | right | 74             | 508          |
| <i>Chirostentotes pergracilis</i> | TMP 1979.020.0001 | right | 51             | 297          |
| <i>Sauromitholestes langstoni</i> | TMP 2001.000.0014 | right | 35             | 206          |
| <i>Sauromitholestes langstoni</i> | TMP 2004.003.0007 | right | 31             | 203          |
| <i>Avimimus portentosus</i>       | TMP 2000.050.0006 | left  | 20             | 177          |

All measurements in millimeters. Proximal width was measured from the junction between the neck and head of the femur transversely to the lateral surface of the element. Asterisk denotes estimated length based on a linear regression on the log-transformed data shown here.

doi:10.1371/journal.pone.0127792.t001

approximately 30° north (i.e., equivalent to Baja California today [44, 46, 47]). This hypothesis implies over 3000 km of northerly displacement between the site of original deposition and the present position of Sucia Island strata. Alternatively, the rocks of the Nanaimo Group have been interpreted as having been deposited much closer to their current location, or at a latitude corresponding to that of present day northern California [48, 49].

## Results

### Systematic Paleontology

Dinosauria Owen 1842 [50]

Theropoda Marsh 1881 [51]

Theropoda indet.

**Referred specimen.** University of Washington Burke Museum (UWBM) 95770, proximal portion of left femur.

**Horizon and locality.** Collected from a dark gray silty sandstone of the shallow marine Cedar District Formation, Nanaimo Group at Ev Henry Point, Sucia Island State Park, Washington (locality UWBM C1659). Based on invertebrate biostratigraphy and magnetostratigraphic correlation, Ward et al. [41] considered the Cedar District Formation to be early middle Campanian (~80 Ma) in age.

**Diagnosis.** UWBM 95770 can be identified as a theropod dinosaur based on its possession of a hollow medullary cavity and the relatively proximal position of the fourth trochanter (Figs 2 and 3).

### Description and Comparisons

We interpret UWBM 95770 as the proximal portion of a left femur. As preserved, the element measures 42.5 cm in length and 22.4 cm in maximum width, across what remains of the

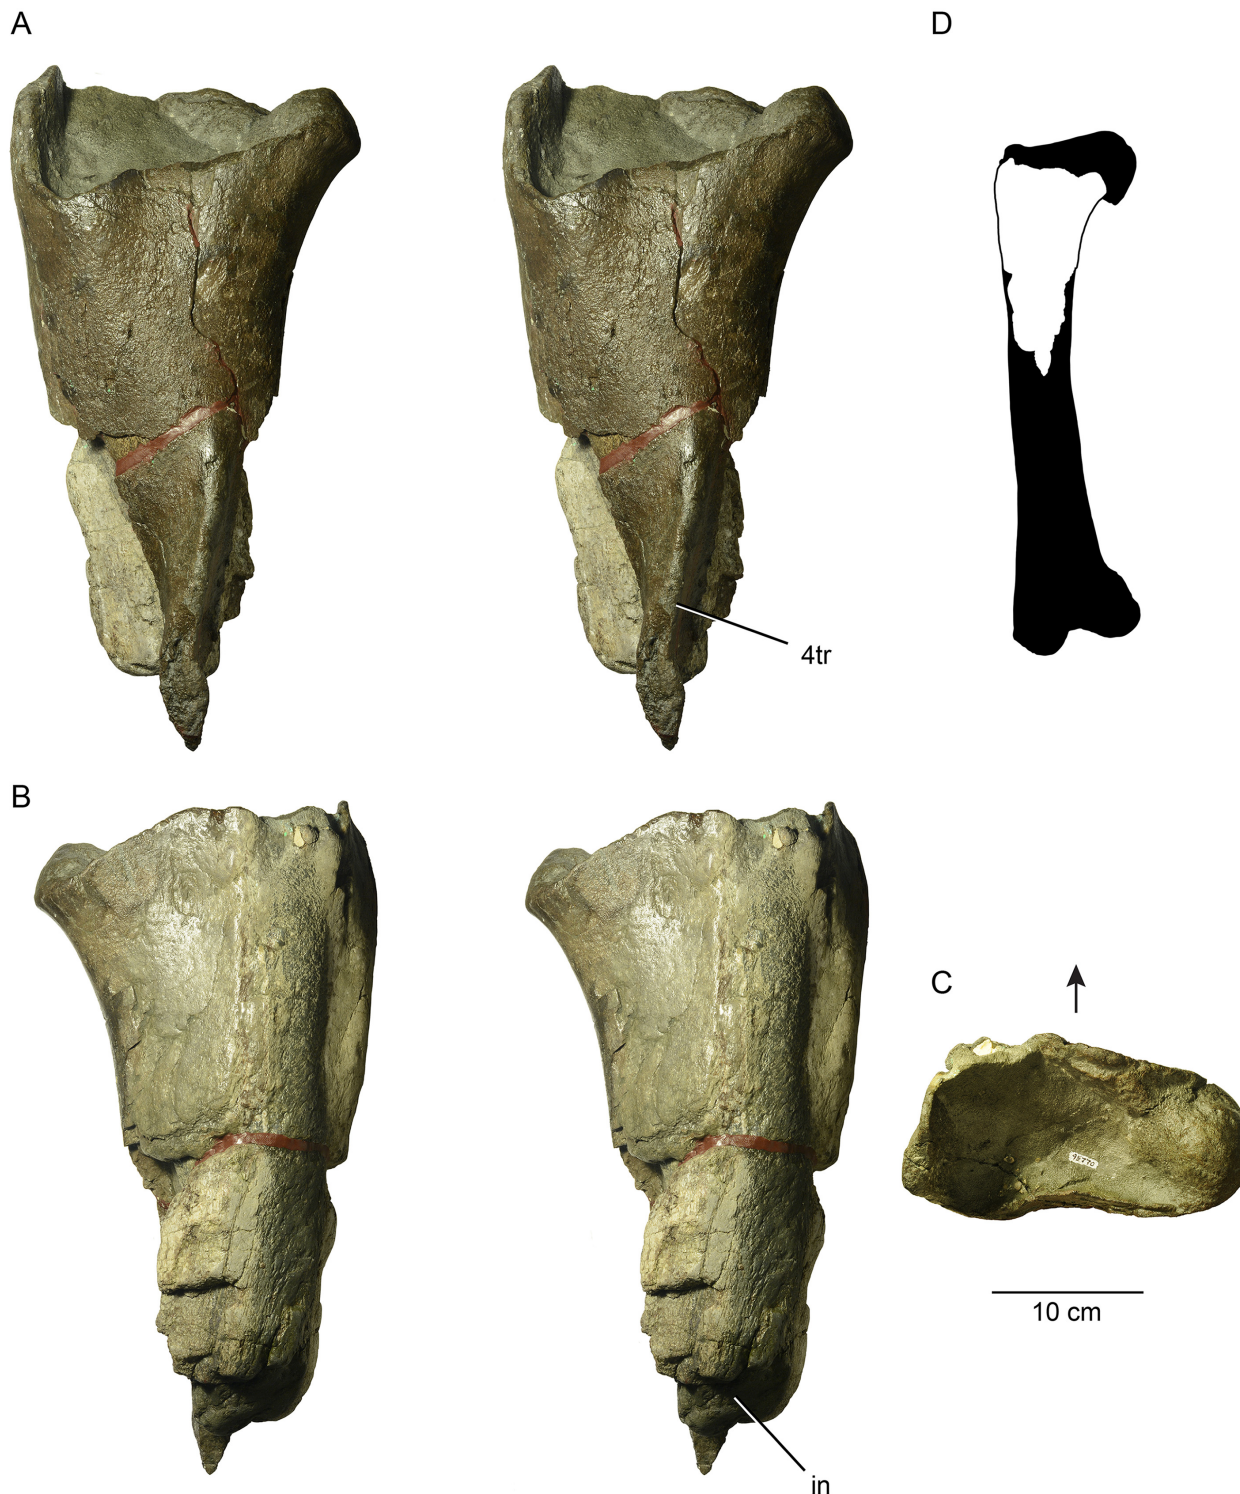

**Fig 2. The proximal femur of a large theropod dinosaur from Washington State.** Stereopairs of UWBM 95770 in posterior (A), anterior (B) view. Proximal view (C) of UWBM 95770, with arrow indicating anterior direction. Silhouette of complete theropod femur (D) based on the tyrannosaurid *Daspletosaurus torosus* (TMP 2001.36.01), with corresponding portion of UWBM 95770 highlighted. **Abbreviations:** 4tr, fourth trochanter; in, matrix infilling of hollow marrow cavity.

doi:10.1371/journal.pone.0127792.g002

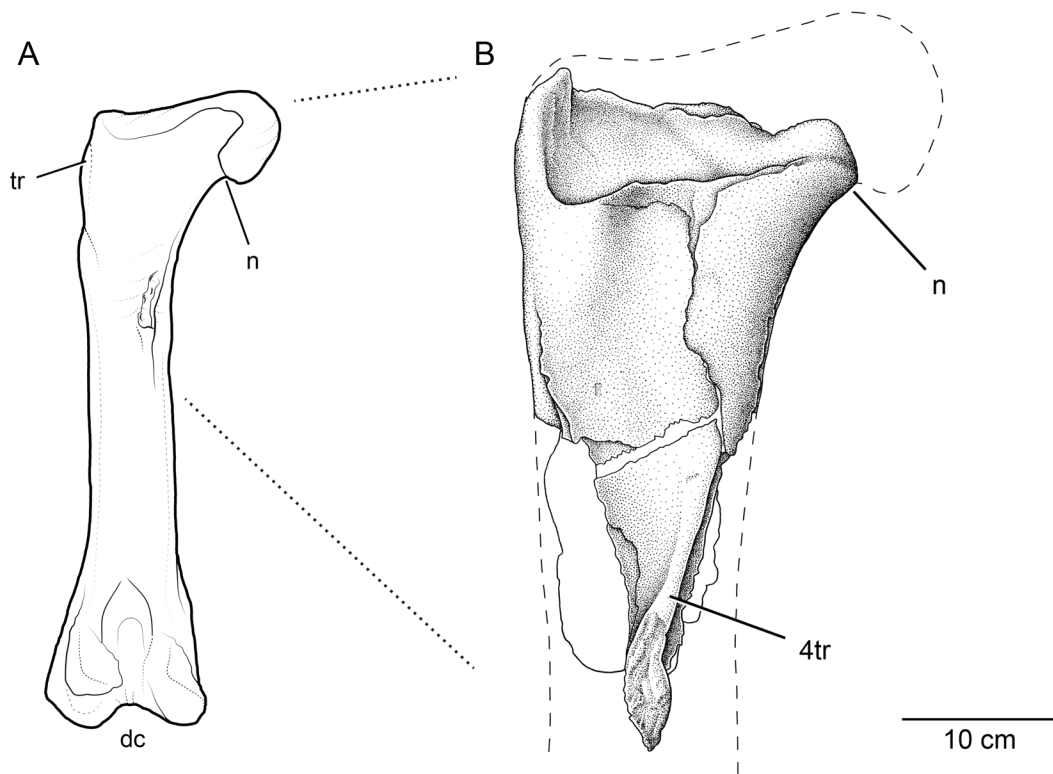

**Fig 3. Comparison of theropod dinosaur femora in posterior view.** Illustration of complete theropod femur (A), based on the tyrannosaurid *Daspletosaurus torosus* (TMP 2001.36.01; total length 987 mm) and (B) the Washington State theropod (UWBM 95770). **Abbreviations:** 4tr, fourth trochanter; dc, distal condyles; n, femoral neck; tr, area of greater trochanter (but this feature is better seen in anterior view).

doi:10.1371/journal.pone.0127792.g003

femoral head. At its preserved midlength, the element has a circumference of 40.6 cm and is notably wider medio-laterally (14.6 cm) than cranio-caudally (11.9 cm), although the latter measurement must be considered a minimum due to weathering. In posterior view (Figs 2A and 3B), the specimen is roughly triangular in shape, with a broad proximal region tapering towards the remnants of the high and elongate fourth trochanter. As a result of being exposed in an intertidal region, the anterior face of UWBM 95770 is deeply weathered to display the inner spongiosa (Fig 2B). In distal view, the cross-section of the in-filled medullary cavity measures (minimally) 6 cm wide and 3.5 cm anteroposteriorly.

Only the base of the femoral neck is preserved (Fig 3). Erosion appears to have particularly affected the dorsal and articular surfaces of the femur, possibly because these areas lacked a finished periosteal surface. In fact, fossil invertebrates, including the common bivalve *Crassatellites conradiana*, were found scattered inside the body of the proximal femur, suggesting that biological activity was at least partially responsible for this taphonomic loss. In proximal view (Fig 2C), the specimen has a relatively straight posterior margin and a broadly arched anterior outline. The proximal shape differs substantially from the proximal view of complete theropod femora (e.g., [52]), but the absence of the large lesser trochanter in UWBM 95770 must be kept in mind. In anterior view, the periosteal surface is generally complete and well preserved, except for the middle one-third, which is deeply eroded such that trabecular bone of the interior is visible. Erosion becomes more prominent distally, with the hollow interior of the bone represented by a dark gray siltstone matrix infilling. The area of the greater trochanter preserves compact bone of the periosteum, but it is difficult to determine if it represents the original external surface or a slightly deeper level.

The apices of the complete periosteal surfaces of the base of the femoral neck and the greater trochanter are in-line with one another across the long axis of the preserved cross-section. This morphology suggests that the missing femoral head would have been oriented directly medially, and not anteromedially as in non-tetanuran theropods [53, 54].

The posterior aspect of the femur is generally well preserved and features the most diagnostic aspect of its anatomy, a distinct fourth trochanter (Figs 2A and 3B). Proximally, the fourth trochanter is somewhat inset from the medial surface of the femoral shaft and runs slightly laterally across the shaft towards its distal termination. In cross-section, the proximal portion of the trochanter has a steep-sided medial surface and a relatively broad lateral surface that blends into the posterior face of the femoral shaft. Although the surrounding femoral shaft is incomplete, the distal portion of the fourth trochanter appears much more prominent and ridge-like. In addition, the proximal half of the trochanter has a smooth surface whereas the distal half is rugose, which suggests that this muscle attachment continued in cartilage in life. A similar condition is seen in *Daspletosaurus torosus* (TMP 2001.36.01), where the middle portion of the fourth trochanter is rugose and unfinished (Fig 3A).

When taken in combination with the presence of hollow bone, the anatomy of the fourth trochanter supports the identification of UWBM 95770 as a non-paravian (non-eumaniraptoran sensu [55]) theropod dinosaur (e.g., a ceratosaur, megalosauroid, allosauroid, or tyrannosauroid). A relatively proximal location of the fourth trochanter, typically within the proximal one-third of the femur, is diagnostic of theropods among Cretaceous dinosaurs [56], although this placement likely first evolved among Triassic dinosauriforms [57, 58]. In other large-bodied Cretaceous dinosaurs, such as hadrosaurids or ceratopsians, the fourth trochanter is placed near the femoral mid-shaft and takes the form of a triangular prominence or long low ridge, respectively [59–61]. Although the specimen is incomplete, measurement data demonstrate that UWBM 95770 preserves enough anatomy to indicate a theropod-like position of the fourth trochanter. It should be noted, however, that derived paravian theropods are characterized by a reduced fourth trochanter that can be nearly indistinguishable from the femoral shaft [55].

## Predicted Total Length of UWBM 95770

In order to compare UWBM 95770 more broadly with other large theropods, we used measurement data to estimate its total length when complete. Linear measurements were taken from theropod femora housed in the Royal Tyrrell Museum of Palaeontology (Table 1). Proximal width was measured from the junction between the neck and head of the femur transversely to the lateral surface of the element. Length was measured from the dorsal-most point of the proximal surface, usually above the point where the femoral neck and head meet, parallel to the femoral shaft to the distal-most prominence of the condyles.

We used R [62] to compute a logarithmic line of best fit between femur proximal transverse width and total length ( $r^2 = 0.9483$ ), and then used this relationship to predict the total length of UWBM 95770 (with 95% confidence intervals) based on its proximal width alone. This method predicts UWBM 95770 to be  $1167 \pm 63$  mm in total length, which suggests that UWBM 95770 represents a theropod similar in size to *Albertosaurus*, *Daspletosaurus*, or *Acrocanthosaurus* [63] and somewhat smaller than *Tyrannosaurus*.

## Discussion

### Large Theropods of the Late Cretaceous

Given what is preserved in UWBM 95770, a more specific taxonomic identification (i.e., beyond non-paravian theropod) is not possible on anatomical grounds. However, several candidate theropod subclades are plausible. For example, carcharodontosaurian allosauroids are

known from the Cretaceous of North America, including the carcharodontosaurid *Acrocanthosaurus atokensis* from the Aptian-Albian [63, 64]. Other carcharodontosaurids are known from the Cenomanian of South America [65, 66] and Turonian of Asia [67] and both continents experienced faunal exchange with Laramidia throughout the Cretaceous [68], including hadrosaurid sister taxa spread between Laramidia and South America in the Campanian [69–71]. Neovenatorid carcharodontosaurians are also known from the Cenomanian through Santonian of South America [72–75], and importantly a new neovenatorid was recently described from the Cenomanian of Laramidia [76], but in rocks approximately 18 MY older than those of the Cedar District Formation. If UWBM 95770 pertains to either a carcharodontosaurid or neovenatorid carcharodontosaurian, it would represent the youngest known material belonging to that clade from North America.

Spinosaurid megalosauroids are known mostly from the Early Cretaceous and have not been found in North America [77, 78]. Megalosaurid megalosauroids are well known from the Late Jurassic of North America, but absent from the Cretaceous worldwide, with the tantalizing possible exception of a distal tibia from the Coniacian-Santonian Hidden Lake Formation of Ross Island, Antarctica [53]. Late Cretaceous abelisauroid ceratosaurians were very diverse and known mostly from the continents of Gondwana, although more recent finds have been made in Europe [73, 79, 80]. Both large and small-bodied abelisauroids share low, subtle fourth trochanters, which are distinct from the prominent ridge-like morphology seen in UWBM 95770 [53, 54]. Ceratosaurians and megalosauroids both retain a degree of anteromedial angling of the femoral head relative to the medio-lateral axis of the diaphysis not evidenced in UWBM 95570 [53], and although circumstantial, provenance also suggests that UWBM 95770 belongs to neither a megalosauroid nor a ceratosaurian.

Three subclades of Maniraptoriformes contain lineages known to have been capable of producing a femur the size of UWBM 95770, though two can be reasonably discounted. Ornithomimosaurids are known predominantly from the Cretaceous of Asia, although taxa have been discovered in Europe and Africa as well [81, 82]. In North America isolated ornithomimosaur material has been found in the Aptian/Albian of both Laramidia (Cloverly Formation; [83]) and the eastern subcontinent Appalachia (Arundel Formation; [84]). Two genera of ornithomimid ornithomimosaurids are known from the Campanian and Maastrichtian of Laramidia, *Struthiomimus* and *Ornithomimus*, but are too small to have produced UWBM 95770 [85, 86]. Recently the first nearly complete skeletons of the gigantic ornithomimosaur, *Deinocheirus mirificus*, were discovered in the upper Campanian or lower Maastrichtian Nemegt Formation of Mongolia [87]. At this point, there is not enough evidence to rule out a large deinocheirid ornithomimosaur as a source for UWBM 95770. However, if UWBM 95770 represented a deinocheirid, it would be the first record of the clade in North America.

Therizinosaurids are known from the Barremian through Maastrichtian of Laramidia, but higher diversity within the group is known from the Early Cretaceous through Maastrichtian of Asia [88–91]. The femora of therizinosaurids, especially the large-bodied therizinosaurids, were oval in cross-section, relatively wider mediolaterally than anteroposteriorly, which is a well-known phenomenon associated with the biomechanics of large body size [56, 92]. The known fourth trochanters of large therizinosaurids, like *Erliaosaurus* and *Neimongosaurus*, are low and poorly developed [93, 94], suggesting that UWBM 95770 does not pertain to a large therizinosaurid.

Several taxa of caenagnathid oviraptorosaurs are known from the Campanian and Maastrichtian of Laramidia along the Western Interior Seaway [95]. However, these taxa and their Asian relatives, including the enormous *Gigantoraptor erlianensis*, lack a raised fourth trochanter and therefore could not have produced UWBM 95770 [96, 97].

The Late Cretaceous of North America hosted the height of tyrannosauroid diversity, with potentially up to nine genera known from the Campanian and Maastrichtian of Laramidia



alone [4, 98]. *Lythronax argestes* was recently described from the middle Campanian (between  $80.6 \pm 0.15$  MA and  $79.9 \pm 0.3$  MA) of Utah as the earliest occurring member of Tyrannosauridae, overlapping the time of Cedar District Formation deposition [4, 41]. Other Campanian tyrannosauroids from Laramidia include *Daspletosaurus torosus*, *Gorgosaurus libratus*, *Teratophoneus curriei*, and *Bistahieversor sealeyi* [99–102]. The diversity of tyrannosauroids and their widespread occurrence on Laramidia suggest that it would not be surprising if UWBM 95770 belonged to this clade. An earliest Campanian origin of tyrannosaurids on Laramidia was proposed by Loewen et al. [4]. If the Baja-British Columbia (BBC) hypothesis is correct and UWBM 95770 represents a tyrannosauroid, then it would represent a larger individual than previously known from the mid-Campanian of southern Laramidia (see size estimation, above). On the other hand, if BBC is incorrect, then UWBM 95770 would be about 2 MY older than the oldest tyrannosauroid from northern Laramidia.

## Dinosaur Assemblages from the West Coast of Laramidia

In contrast to the rich fossil record of the eastern flank of Laramidia, the west coast of the subcontinent has yielded comparatively fragmentary material, with most occurrences based on specimens preserved in marine or near-marine environments [36]. Baja California, México has produced the largest diversity of dinosaurs from this region, but most of the taxa are based on isolated elements recovered from beach or nearshore lagoon and playa deposits [22, 27, 28, 103]. Isolated hadrosaurid bones (Hadrosauridae indet.) have been found in three successive formations in the area around El Rosario, with the majority coming from the middle ‘El Gallo’ Formation. On the basis of tall neural spines on the caudal vertebrae and a boot on the distal ischium, Morris [27] referred hadrosaur material from Baja California to *Hypacrosaurus altispinus*. Morris eventually revised the taxonomy of the Baja material to *cf. Lambeosaurus* before erecting a new species, *Lambeosaurus laticaudus* in 1981 [29, 35]. Recently, Prieto-Márquez et al. [31] conducted an in-depth analysis, including a critical evaluation of the postcrania, and assigned the Baja hadrosaurid bones to a new genus, *Magnapaulia*. *Magnapaulia laticaudus* was an enormous hadrosaurid, with an estimated body length in the realm of 12–15 meters [29, 31]. Other ornithischian remains from the ‘El Gallo’ include an isolated tooth referable to an indeterminate nodosaurid ankylosaurian [104], and indeterminate ceratopsian teeth [6, 27] that warrant full description. The saurischian record of the ‘El Gallo’ consists almost completely of isolated teeth, belonging to putative tyrannosaurids, the dromaeosaurid *Saurornitholestes sp.*, and the troodontid *Troodon formosus* [32, 105]. Postcranial remains attributable to Tyrannosauridae [30] and a possible ornithomimid [105] are also known, although the ornithomimid material has not been figured or formally described, as far as we are aware.

Two theropod genera have been named from the underlying lower-middle Campanian La Bocana Roja Formation of Baja California, the enantiornithine bird *Alexornis antecedens* [33] and the enigmatic, large-bodied *Labocania anomala* [34]. *Labocania* is known exclusively from fragmentary cranial remains, parts of an ischium and pubis, a metatarsal II, and a chevron belonging to a single individual. It shares traits with tyrannosaurids, as well as with other large theropods [30, 106, 107]. Molnar [34] compared the cranial material of *Labocania* favorably with taxa now considered to be abelisaurid and neovenatorid theropods. *Labocania* warrants further study, especially with UWBM 95770 representing another large theropod from roughly coeval rocks.

Fossils from California (i.e., the Point Loma, Ladd/Williams, Moreno, Chico, and Budden Canyon formations) come from both fluvial and marine rocks, with the ankylosaur *Aletopelta coombsi* of the Point Loma Formation representing the rare instance of a near-complete unit of dermal ossifications, held together by skin [25]. Fragmentary hadrosaurid bones (Hadrosauridae indet.) are the most common dinosaur fossils throughout California. Two partial skeletons

from the Moreno Formation were ascribed to the hadrosaur *Saurolophus* by Morris [22], but Prieto-Márquez et al. [23] later referred the skeletons and additional cranial material to the novel genus and species *Augustynolophus morrisoni* (see also [108]). Turbidite facies within the marine Chico Formation have yielded isolated bones of three avian dinosaurs along with mollusk shells and teeth belonging to actinopterygians and sharks. Two of the avian bones pertain to toothed ornithurine birds (*Ichthyornis sp.* and *Hesperornis sp.*) common on the other side of Laramidia in the Western Interior Seaway, whereas the third is the ulna of an indeterminate neognath [19, 20]. In northern California the Lower Cretaceous marine Budden Canyon Formation has produced the stratigraphically lowest Pacific coast dinosaur fossil: a 'hypsilophodontid' hind limb (Ornithopoda indet.) [21]. Beyond the rare occurrence of dinosaurs, the Mesozoic marine rocks of California have routinely produced fossils of marine reptiles like thalattosaurs, ichthyosaurs, plesiosaurs, mosasaurs, and sea turtles as well as occasional fragmentary pterosaurs [19].

The sole Mesozoic dinosaur fossil known from Oregon is a sacrum that probably belongs to an indeterminate hadrosaurid. The specimen was discovered in the Cape Sebastian Sandstone Formation and, despite being mentioned in the literature [2, 18], it does not appear to have been accessioned at a public repository or to have been formally described.

UWBM 95770 belongs to a large theropod, likely that of a tyrannosaur, and is the sole Mesozoic dinosaur fossil from Washington, but not the first from the Nanaimo Group as both birds and a possible ornithomimid have been recovered from the Gulf Islands of British Columbia. Upper Cretaceous marine rocks of the Northumberland Formation on Hornsby Island, British Columbia have produced several limb elements of ornithurine and enantiornithine birds [16, 17]. There is evidence for at least two taxa of each clade, including species of relatively large body size for Mesozoic birds, which indicate a previously unknown diversity of birds in Pacific marine ecosystems. Bullard [109] described a weathered mid-caudal vertebra from the Cedar District Formation of Denman Island and referred it to? Ornithomimidae on the basis of a ventral keel on the centrum, amphiplatan articular faces, and comparisons with ornithomimid vertebrae at the Royal Tyrrell Museum of Palaeontology. The specimen is housed in the Royal British Columbia Museum (RBCM.EH2010.001.0001.01) and warrants restudy. Santonian-aged rocks from British Columbia have produced marine-adapted species including mosasaurs, an elasmosaurid, and desmatochelyid turtles [110]. A previously reported theropod tooth from Vancouver Island is now considered to be that of a mosasaur, *Kourisodon puntledgensis* [16, 110–112].

Two ornithischians have been found in marine strata of the Matanuska Formation of south-central Alaska. Gangloff [13] first reported a partial skull of the nodosaurid *Edmontonia sp.* from the Campanian-Maastrichtian Member 3 of the Matanuska Formation as the first Alaskan dinosaur outside of the North Slope. Subsequently, Pasch and May [14] described a relatively early occurring indeterminate hadrosaur from Member 4, which is well dated to the Turonian.

## Acknowledgments

We thank Jim Goedert and David Starr for initially discovering the specimen and alerting us to its location. In addition, we acknowledge the members of the Burke Museum team for collecting the fossil (Bruce Crowley, Ron Eng, Don Hopkins, Adam Huttenlocker) and the administration of Sucia Island State Park (Steve Sabine, Ted Schlund) for access and permissions. We thank Morgan Turner for producing the excellent illustrations, Leander Love-Anderegg for technical assistance, and Peter Ward for discussions concerning Sucia Island geology. Edie Adams provided critical support for this project. We recognize Don Brinkman, Brandon Strilisky, and Darren Tanke for access to comparative material at the Royal Tyrrell Museum of Palaeontology. Finally, we thank Phil Currie and Andrea Cau for their timely and useful reviews.

## Author Contributions

Conceived and designed the experiments: BRP CAS. Performed the experiments: BRP CAS. Analyzed the data: BRP CAS. Contributed reagents/materials/analysis tools: BRP CAS. Wrote the paper: BRP CAS.

## References

1. Brusatte SL, Butler RJ, Prieto-Márquez A, Norell MA. Dinosaur morphological diversity and the end-Cretaceous extinction. *Nature Communications*. 2012; 3:804. doi: [10.1038/ncomms1815](https://doi.org/10.1038/ncomms1815) PMID: [22549833](https://pubmed.ncbi.nlm.nih.gov/22549833/)
2. Weishampel DB, Barrett PM, Coria RA, Loeuff JL, Xu X, Zhao X, et al. Dinosaur distribution. In: Weishampel DB, Dodson P, Osmólska H, editors. *The Dinosauria*, 2nd Edition: University of California Press, Berkeley; 2004. p. 517–606.
3. Lehman TM. Late Campanian dinosaur biogeography in the western interior of North America. In: Wolberg D, Stump E, editors. *Dinofest International Proceedings*. Philadelphia: Philadelphia Academy of Sciences; 1997. p. 233–40.
4. Loewen MA, Irmis RB, Sertich JJW, Currie PJ, Sampson SD. Tyrant dinosaur evolution tracks the rise and fall of Late Cretaceous oceans. *PLoS ONE*. 2013; 8:e79420. doi: [10.1371/journal.pone.0079420](https://doi.org/10.1371/journal.pone.0079420) PMID: [24223179](https://pubmed.ncbi.nlm.nih.gov/24223179/)
5. Sampson SD, Loewen MA, Farke AA, Roberts EM, Forster CA, Smith JA, et al. New horned dinosaurs from Utah provide evidence for intracontinental dinosaur endemism. *PLoS ONE*. 2010; 5(9):e12292. doi: [10.1371/journal.pone.0012292](https://doi.org/10.1371/journal.pone.0012292) PMID: [20877459](https://pubmed.ncbi.nlm.nih.gov/20877459/)
6. Rivera-Sylva HE, Carpenter K. Mexican ornithischian dinosaurs. In: Rivera-Sylva HE, Carpenter K, Frey E, editors. *Dinosaurs and Other Reptiles from the Mesozoic of Mexico*. Bloomington: Indiana University Press; 2014. p. 156–80.
7. Vavrek MJ, Larsson HCE. Low beta diversity of Maastrichtian dinosaurs of North America. *Proceedings of the National Academy of Sciences*. 2010; 107(18):8265–8. doi: [10.1073/pnas.0913645107](https://doi.org/10.1073/pnas.0913645107) PMID: [20404176](https://pubmed.ncbi.nlm.nih.gov/20404176/)
8. Carpenter K, Dilkes D, Weishampel DB. The dinosaurs of the Niobrara Chalk Formation (Upper Cretaceous, Kansas). *Journal of Vertebrate Paleontology* 1995; 15:275–97.
9. Fiorillo AR. The first occurrence of hadrosaur (Dinosauria) remains from the marine Claggett Formation, Late Cretaceous of south-central Montana. *Journal of Vertebrate Paleontology*. 1990; 10:515–7.
10. Horner JR. Upper Cretaceous dinosaurs from the Bearpaw Shale (marine) of south-central Montana with a checklist of Upper Cretaceous dinosaur remains from marine sediments in North America. *Journal of Paleontology* 1979; 53:566–77.
11. Liggett GA. A review of the dinosaurs from Kansas. *Transactions of the Kansas Academy of Science*. 2005; 108:1–14.
12. Marsh OC. Notice on a new species of *Hadrosaurus*. *American Journal of Science* 1872; 3:301.
13. Gangloff RA. *Edmontonia* sp., the first record of an ankylosaur from Alaska. *Journal of Vertebrate Paleontology*. 1995; 15:195–200.
14. Pasch AD, May KC. First occurrence of a hadrosaur (Dinosauria) from the Matanuska Formation (Turonian) in the Talkeetna Mountains of south-central Alaska. *Short Notes on Alaska Geology*. 1997; 1997:99–109.
15. Pasch AD, May KC. Taphonomy and paleoenvironment of a hadrosaur (Dinosauria) from the Matanuska Formation (Turonian) in south-central Alaska. In: Tanke DH, Carpenter K, editors. *Mesozoic vertebrate life*. Bloomington: Indiana University Press; 2001. p. 219–36.
16. Dyke GJ, Wang X, Kaiser G. Large fossil birds from a Late Cretaceous marine turbidite sequence on Hornby Island (British Columbia). *Canadian Journal of Earth Sciences*. 2011; 48:1489–96.
17. Morrison K, Dyke GJ, Chiappe LM. Cretaceous fossil birds from Hornby Island (British Columbia). *Canadian Journal of Earth Sciences*. 2005; 42:2097–101.
18. Orr EL, Orr WN. *Oregon Fossils*. Corvallis: Oregon State University Press; 2009. 300 p.
19. Hilton RP. *Dinosaurs and Other Mesozoic Reptiles of California*. Berkeley: University of California Press; 2003. 312 p.
20. Hilton RP, Gohre ES, Embree PG, Stidham TA. California's first fossil evidence of Cretaceous winged vertebrates. *California Geology* 1999; 52(4):4–10.
21. Hilton RP, DeCourten FL, Murphy MA, Rodda PU, Embree PG. An Early Cretaceous ornithopod dinosaur from California. *Journal of Vertebrate Paleontology*. 1997; 17:557–60.

22. Morris WJ. Mesozoic and Tertiary vertebrates in Baja California. National Geographic Society Research Reports, 1966 projects. 1973:197–209.
23. Prieto-Márquez A, Wagner JR, Bell PR, Chiappe LM. The late-surviving 'duck-billed' dinosaur *Augustomphus* from the upper Maastrichtian of western North America and crest evolution in Saurolophini. *Geological Magazine*. 2014; 152:225–41.
24. Coombs WP, Deméré TA. A Late Cretaceous nodosaurid ankylosaurs (Dinosauria: Ornithischia) from marine sediments of coastal California. *Journal of Paleontology*. 1996; 70:311–26.
25. Ford TL, Kirkland JI. Carlsbad ankylosaur (Ornithischia, Ankylosauria): an ankylosaurid and not a nodosaurid. In: Carpenter K, editor. *The Armored Dinosaurs*. Bloomington: Indiana University Press; 2001. p. 239–60.
26. Morris WJ. California dinosaurs. In: Bottjer DJ, Colburn IP, Cooper JD, editors. *Late Cretaceous Depositional Environments and Paleogeography, Santa Ana Mountains, Southern California*. Los Angeles: Pacific Section, Society of Economic Paleontologists and Mineralogists; 1982. p. 89–90.
27. Morris WJ. Baja California: Late Cretaceous dinosaurs. *Science*. 1967; 155:1539–41. PMID: [17830047](#)
28. Morris WJ. Mesozoic and Tertiary vertebrates in Baja California. National Geographic Society Research Reports. 1968; 1967 projects:195–8.
29. Morris WJ. A new species of hadrosaurian dinosaur from the Upper Cretaceous of Baja California: *Lambeosaurus laticaudus*. *Journal of Paleontology* 1981; 55:453–62.
30. Peacock BR, Wilson JA, Hernández-Rivera R, Montellano-Ballesteros M, Wilson GP. First tyrannosaurid remains from the Upper Cretaceous “El Gallo” Formation of Baja California, México. *Acta Palaeontologica Polonica*. 2014; 59(1):71–80.
31. Prieto-Márquez A, Chiappe LM, Joshi SH. The lambeosaurine dinosaur *Magnapaulia laticaudus* from the Late Cretaceous of Baja California, northwestern México. *PLoS ONE*. 2012; 7:e38207. doi: [10.1371/journal.pone.0038207](#) PMID: [22719869](#)
32. Rivera-Sylva HE, Carpenter K. Mexican saurischian dinosaurs. In: Rivera-Sylva HE, Carpenter K, Frey E, editors. *Dinosaurs and Other Reptiles from the Mesozoic of Mexico*. Bloomington: Indiana University Press; 2014. p. 143–55.
33. Brodkorb P. Discovery of a Cretaceous bird, apparently ancestral to the orders Coraciiformes and Piciformes (Aves: Carinatae). *Smithsonian Contributions to Paleobiology*. 1976; 27:67–73.
34. Molnar RE. A distinctive theropod dinosaur from the Upper Cretaceous of Baja California (Mexico). *Journal of Paleontology* 1974; 48:1009–17.
35. Morris WJ. A giant hadrosaurian dinosaur from Baja California. *Journal of Paleontology*. 1972; 46:777–9.
36. Morris WJ. A review of Pacific Coast hadrosaurs. *Journal of Paleontology* 1973; 47:551–61.
37. Mustard PS. The Upper Cretaceous Nanaimo Group, Georgia Basin. In *Geological hazards of the Vancouver region, southwestern British Columbia*. Geological Survey of Canada, Bulletin. 1994; 481:27–96.
38. Ward PD. Upper Cretaceous ammonites (Santonian-Campanian) from Orcas Island, Washington. *Journal of Paleontology*. 1976; 50:454–61.
39. Ward PD. Baculitids from the Santonian-Maastrichtian Nanaimo Group, British Columbia, Canada and Washington State, USA. *Journal of Paleontology*. 1978; 52:1143–54.
40. Ward PD. Revisions to the stratigraphy and biochronology of the Upper Cretaceous Nanaimo Group, British Columbia and Washington State. *Canadian Journal of Earth Sciences*. 1978; 15:405–23.
41. Ward PD, Haggart JW, Mitchell R, Kirschvink JL, Tobin T. Integration of macrofossil biostratigraphy and magnetostratigraphy for the Pacific Coast Upper Cretaceous (Campanian—Maastrichtian) of North America and implications for correlation with the Western Interior and Tethys. *GSA Bulletin* 2012; 124(5/6):957–74.
42. Muller JE, Jeletzky JA. Geology of the Upper Cretaceous Nanaimo Group, Vancouver Island, and Gulf Islands, British Columbia. *Geological Survey of Canada Paper*. 1970; 69–25:1–77.
43. Haggart JW, Ward PD. New Nanaimo Group ammonites (Cretaceous, Santonian—Campanian) from British Columbia and Washington State. *Journal of Paleontology*. 1989; 63:218–27.
44. Enkin RJ, Baker J, Mustard PS. Paleomagnetism of the Upper Cretaceous Nanaimo Group, southwestern Canadian Cordillera. *Canadian Journal of Earth Sciences*. 2001; 38:1403–22.
45. Haggart JW, Ward PD, Orr WN. Turonian (Upper Cretaceous) lithostratigraphy and biochronology, southern Gulf Islands, British Columbia, and northern San Juan Islands, Washington State. *Canadian Journal of Earth Sciences*. 2005; 42:2001–20.

46. Ward PD, Hurtado JM, Kirschvink JL, Verosub KL. Measurements of the Cretaceous paleolatitude of Vancouver Island: consistent with the Baja—British Columbia hypothesis. *Science*. 1997; 277:1642–5.
47. Wynne PJ, Irving E, Maxson JA, Kleinspehn KL. Paleomagnetism of the Upper Cretaceous strata of Mount Tatlow: evidence for 3000 km of northward displacement of the eastern Coast Belt, British Columbia. *Journal of Geophysical Research*. 1995; 100:6073–91.
48. Kim B, Kodama KP. A compaction correction for the paleomagnetism of the Nanaimo Group sedimentary rocks: implications for the Baja British Columbia hypothesis. *Journal of Geophysical Research: Solid Earth* 2004; 109:B02102.
49. Cowan DS, Brandon MT, Garver JL. Geologic tests of hypotheses for large coastwise displacements—a critique illustrated by the Baja British Columbia controversy. *American Journal of Science*. 1997; 297:117–78.
50. Owen R. Report on British fossil reptiles, part II. Report of the British Association for the Advancement of Science. 1842; 11:60–204.
51. Marsh OC. Principal characters of American Jurassic dinosaurs. Part V. *American Journal of Science Series 3*. 1881; 21:417–23.
52. Brochu CA. Osteology of *Tyrannosaurus rex*: insights from a nearly complete skeleton and high-resolution computed tomographic analysis of the skull. *Journal of Vertebrate Paleontology* 2003; 22 (supplement to issue 4):1–138.
53. Carrano MT, Benson RBJ, Sampson SD. The phylogeny of Tetanurae (Dinosauria: Theropoda). *Journal of Systematic Paleontology*. 2012; 10:211–300.
54. Carrano MT, Sampson SD, Forster CA. The osteology of *Masiakasaurus knopfleri*, a small abelisaurid (Dinosauria: Theropoda) from the Late Cretaceous of Madagascar. *Journal of Vertebrate Paleontology*. 2002; 22:510–34.
55. Hutchinson JR. The evolution of femoral osteology and soft tissues on the line to extant birds (Neornithes). *Zoological Journal of the Linnean Society*. 2001; 131:169–97.
56. Carrano MT. The evolution of dinosaur locomotion: functional morphology, biomechanics, and modern analogs. [Ph. D. dissertation]. Chicago 1998.
57. Dzik J. A beaked herbivorous archosaur with dinosaur affinities from the early Late Triassic of Poland. *Journal of Vertebrate Paleontology*. 2003; 23:556–74.
58. Nesbitt SJ, Sidor CA, Irmis RB, Angielczyk KD, Smith RMH, Tsuji LA. Ecologically distinct dinosaurian sister group shows early diversification of Ornithodira. *Nature*. 2010; 464:95–8. doi: [10.1038/nature08718](https://doi.org/10.1038/nature08718) PMID: [20203608](https://pubmed.ncbi.nlm.nih.gov/20203608/)
59. Dodson P, Forster CA, Sampson SD. Ceratopsidae. In: Weishampel DB, Dodson P, Osmólska H, editors. *The Dinosauria*, 2nd Edition: University of California Press, Berkeley; 2004. p. 494–513.
60. Horner JR, Weishampel DB, Forster CA. Hadrosauridae. In: Weishampel DB, Dodson P, Osmólska H, editors. *The Dinosauria*, 2nd Edition. Berkeley: University of California Press; 2004. p. 438–63.
61. Tanke DH. Dinosaurs of the Devon area (Alberta, Canada) with reference to a large hadrosaur femur. *Fossils Quarterly*. 1984; 3:19–30.
62. RCoreTeam. R: A language and environment for statistical computing. 3.1.2 ed. Vienna: R Foundation for statistical computing.; 2014. doi: [10.1016/j.jneumeth.2014.06.019](https://doi.org/10.1016/j.jneumeth.2014.06.019) PMID: [24970579](https://pubmed.ncbi.nlm.nih.gov/24970579/)
63. Currie PJ, Carpenter K. A new specimen of *Acrocanthosaurus atokensis* (Theropoda, Dinosauria) from the Lower Cretaceous Antlers Formation (Lower Cretaceous, Aptian) of Oklahoma, USA. *Geodiversitas*. 2000; 22:207–46. PMID: [10655043](https://pubmed.ncbi.nlm.nih.gov/10655043/)
64. Stovall JW L W Jr. *Acrocanthosaurus atokensis*, a new genus and species of Lower Cretaceous Theropoda from Oklahoma. *American Midland Naturalist* 1950; 43:696–728.
65. Coria RA, Currie PJ. A new carcharodontosaurid (Dinosauria, Theropoda) from the Upper Cretaceous of Argentina. *Geodiversitas* 2006; 28:71–118.
66. Coria RA, Salgado L. A new giant carnivorous dinosaur from the Cretaceous of Patagonia. *Nature*. 1995; 377:225–6.
67. Brusatte SL, Benson RBJ, Chure DJ, Xu X, Sullivan C, Hone DWE. The first definitive carcharodontosaurid (Dinosauria: Theropoda) from Asia and the delayed ascent of tyrannosaurids. *Naturwissenschaften*. 2009; 96:1051–8. doi: [10.1007/s00114-009-0565-2](https://doi.org/10.1007/s00114-009-0565-2) PMID: [19488730](https://pubmed.ncbi.nlm.nih.gov/19488730/)
68. Farke AA, Maxwell WD, Cifelli RL, Wedel MJ. A ceratopsian dinosaur from the Lower Cretaceous of western North America, and the biogeography of Neoceratopsia. *PLoS ONE*. 2014; 9:e112055. doi: [10.1371/journal.pone.0112055](https://doi.org/10.1371/journal.pone.0112055) PMID: [25494182](https://pubmed.ncbi.nlm.nih.gov/25494182/)

69. Juárez Valieri RD, Haro JA, Fiorelli LE, Calvo JO. A new hadrosauroid (Dinosauria: Ornithopoda) from the Allen Formation (Late Cretaceous) of Patagonia, Argentina. *Revisita del Museo Argentino de Ciencias Naturales* 2010; 12:217–31.
70. Prieto-Márquez A. Global phylogeny of Hadrosauridae (Dinosauria: Ornithopoda) using parsimony and Bayesian methods. *Zoological Journal of the Linnean Society* 2010; 159:435–502.
71. Prieto-Márquez A, Salinas G. A re-evaluation of *Secernosaurus koeneri* and *Kritosaurus australis* (Dinosauria, Hadrosauridae) from the Late Cretaceous of Argentina. *Journal of Vertebrate Paleontology* 2010; 30:813–37.
72. Novas FE. *Megaraptor namunhuaiquii*, gen. et sp. nov., a large-clawed, Late Cretaceous theropod from Patagonia. *Journal of Vertebrate Paleontology*. 1998; 18:4–9.
73. Novas FE, Agnolín FL, Ezcurra MD, Porfiri J, Canale JI. Evolution of the carnivorous dinosaurs during the Cretaceous: the evidence from Patagonia. *Cretaceous Research*. 2013; 34:174–215.
74. Novas FE, Ezcurra MD, Lecuona A. *Orkoraptor burkei* nov. gen. et sp., a large theropod from the Maastrichtian Pari Aike Formation, Southern Patagonia, Argentina. *Cretaceous Research* 2008; 29:468–80.
75. Sereno PC, Martinez RN, Wilson JA, Varricchio DJ, Alcober OA, Larsson HCE. Evidence for avian intrathoracic air sacs in a new predatory dinosaur from Argentina. *PLoS ONE*. 2008; 3.
76. Zanno LE, Makovicky PJ. Neovenatorid theropods are apex predators in the Late Cretaceous of North America. *Nature Communications*. 2013; 4:2827. doi: [10.1038/ncomms3827](https://doi.org/10.1038/ncomms3827) PMID: [24264527](https://pubmed.ncbi.nlm.nih.gov/24264527/)
77. Kellner AWA, Azevedo SAK, Machado EB, Carvalho LBd, Henriques DDR. A new dinosaur (Theropoda, Spinosauridae) from the Cretaceous (Cenomanian) Alcântara Formation, Cajual Island, Brazil. *Anais da Academia Brasileira de Ciências*. 2011; 83:99–108.
78. Stromer E. Ergebnisse der Forschungsreisen Prof. E. Stromer in den Wüsten Ägyptens. II. Wirbeltier-Reste der Baharije-Stufe (unterstes Cenoman). 3. Das Original des Theropoden *Spinosaurus aegyptiacus* nov. gen., nov. spec. *Abhandlungen der Königlich Bayerischen Akademie der Wissenschaften, Mathematisch-physikalische Classe*. 1915; 28:1–32.
79. Pol D, Rauhut OWM. A Middle Jurassic abelisaurid from Patagonia and the early diversification of the theropod dinosaurs. *Proceedings of the Royal Society, B*. 2012; 279:3170–5. doi: [10.1098/rspb.2012.0660](https://doi.org/10.1098/rspb.2012.0660) PMID: [22628475](https://pubmed.ncbi.nlm.nih.gov/22628475/)
80. Tortosa T, Buffetaut E, Vialle N, Dutour Y, Turini E, Cheylan G. A new abelisaurid dinosaur from the Late Cretaceous of southern France: palaeobiogeographical implications. *Annales de Paléontologie*. 2014; 100:63–86.
81. Choiniere J N, Forster CA, de Klerk WJ. New information on *Nqwebasaurus thwazi*, a coelurosaurian theropod from the Early Cretaceous Kirkwood Formation in South Africa. *Journal of African Earth Sciences*. 2012; 71:1–17.
82. Makovicky PJ, Kobayashi Y, Currie PJ. Ornithomimosauria. In: Weishampel DB, Dodson P, Osmólska H, editors. *The Dinosauria*, 2nd Edition. Berkeley: University of California Press; 2004. p. 137–50.
83. Ostrom JH. Stratigraphy and paleontology of the Cloverly Formation (Lower Cretaceous) of the Big-horn Basin Area, Wyoming and Montana. *Bulletin of the Peabody Museum of Natural History*. 1970; 35:1–234.
84. Weishampel DB, Young L. *Dinosaurs of the East Coast*. Baltimore: Johns Hopkins University Press; 1996.
85. Lambe LM. On Vertebrata of the mid-Cretaceous of the Northwest Territory, new genera and species from the Belly River series (mid-Cretaceous). *Geological Survey of Canada, Contributions to Canadian Palaeontology* 1902; 3:25–81.
86. Marsh OC. Description of new dinosaurian reptiles. *American Journal of Science* 1890; 39:81–6.
87. Lee Y-N, Barsbold R, Currie PJ, Kobayashi Y, Lee H-J, Godefroit P, et al. Resolving the long-standing enigma of a giant ornithomimosaur *Deinocheirus mirificus*. *Nature*. 2014; 515:257–60. doi: [10.1038/nature13874](https://doi.org/10.1038/nature13874) PMID: [25337880](https://pubmed.ncbi.nlm.nih.gov/25337880/)
88. Kirkland JI, Wolfe DG. First definitive therizinosaurid (Dinosauria; Theropoda) from North America. *Journal of Vertebrate Paleontology* 2001; 21:410–4.
89. Kirkland JI, Zanno LE, Sampson SD, Clark JM, DeBlieux DD. A primitive therizinosaurid dinosaur from the Early Cretaceous of Utah. *Nature* 2005; 435:84–7. PMID: [15875020](https://pubmed.ncbi.nlm.nih.gov/15875020/)
90. Zanno LE. A taxonomic and phylogenetic re-evaluation of Therizinosauria (Dinosauria: Maniraptora). *Journal of Systematic Paleontology* 2010; 8:503–43.
91. Currie PJ. Theropods, including birds. In: Currie PJ, Koppelhus EB, editors. *Dinosaur Provincial Park: A spectacular ancient ecosystem revealed*. Bloomington: Indiana University Press; 2005. p. 367–97.

92. Wilson JA, Carrano MT. Titanosaurs and the origin of "wide-gauge" trackways: a biomechanical and systematic perspective on sauropod locomotion. *Paleobiology*. 1999; 25(2):252–67.
93. Clark JM, Maryanska T, Barsbold R. Therizinosauroida. In: Weishampel DB, Dodson P, Osmólska H, editors. *The Dinosauria*, 2nd Edition: University of California Press, Berkeley; 2004. p. 151–64.
94. Zhang X-H, Xu X, Zhao X-J, Sereno PC, Kuang X-W, Tan L. A long-necked therizinosauroid dinosaur from the Upper Cretaceous Iren Dabasu Formation of Nei Mongol, People's Republic of China. *Vertebrata Palasiatica*. 2001; 39:282–90.
95. Longrich NR, Barnes K, Clark S, Millar L. Caenagnathidae from the Upper Campanian Aguja Formation of west Texas, and a revision of the Caenagnathinae. *Bulletin of the Peabody Museum of Natural History*. 2013; 54:23–49.
96. Lamanna MC, Sues H-D, Schachner ER, Lyson TR. A new large-bodied oviraptorosaurian theropod dinosaur from the latest Cretaceous of western North America. *PLoS ONE*. 2014; 9:e92022. doi: [10.1371/journal.pone.0092022](https://doi.org/10.1371/journal.pone.0092022) PMID: [24647078](https://pubmed.ncbi.nlm.nih.gov/24647078/)
97. Xu X, Tan Q, Wang J, Tan L. A gigantic bird-like dinosaur from the Late Cretaceous of China. *Nature*. 2007; 447:884–47. PMID: [17593575](https://pubmed.ncbi.nlm.nih.gov/17593575/)
98. Brusatte SL, Norell MA, Carr TD, Erickson GM, Hutchinson JR, Balanoff AM, et al. Tyrannosaur paleobiology: new research on ancient exemplar organisms. *Science*. 2010; 329:1481–5. doi: [10.1126/science.1193304](https://doi.org/10.1126/science.1193304) PMID: [20847260](https://pubmed.ncbi.nlm.nih.gov/20847260/)
99. Carr TD, Williamson TE. *Bistahieversor sealeyi*, gen. et sp. nov., a new tyrannosauroid from New Mexico and the origin of deep snouts in Tyrannosauroida. *Journal of Vertebrate Paleontology*. 2010; 30:1–16.
100. Carr TD, Williamson TE, Britt BB, Stadtman K. Evidence for high taxonomic and morphologic tyrannosauroid diversity in the Late Cretaceous (Late Campanian) of the American southwest and a new short-skulled tyrannosaurid from the Kaiparowits Formation of Utah. *Naturwissenschaften*. 2011; 98:241–6. doi: [10.1007/s00114-011-0762-7](https://doi.org/10.1007/s00114-011-0762-7) PMID: [21253683](https://pubmed.ncbi.nlm.nih.gov/21253683/)
101. Lambe LM. On a new genus and species of carnivorous dinosaur from the Belly River Formation of Alberta, with a description of *Stephanosaurus marginatus* from the same horizon. *Ottawa Naturalist* 1914; 28:13–20.
102. Russell DA. Tyrannosaurs from the Late Cretaceous of western Canada. *National Museum of Natural Sciences Publications in Paleontology*. 1970; 1:1–34.
103. Stinnesbeck W, Frey E. Paleogeography and paleoenvironment of Mexico during the Mesozoic. In: Rivera-Sylva HE, Carpenter K, Frey E, editors. *Dinosaurs and Other Reptiles from the Mesozoic of Mexico*. Bloomington: Indiana University Press; 2014. p. 13–29.
104. Rivera-Sylva HE, Carpenter K, Aranda-Manteca FJ. Late Cretaceous nodosaurids (Ankylosauria: Ornithischia) from Mexico. *Revisita Mexicana de Ciencias Geológicas* 2011; 28:371–8.
105. Hernández-Rivera R. Mexican dinosaurs. *Encyclopedia of Dinosaurs*: Academic Press; 1997. p. 433–7.
106. Holtz TR. Tyrannosauroida. In: Weishampel DB, Dodson P, Osmólska H, editors. *The Dinosauria*, 2nd Edition. Berkeley: University of California Press; 2004. p. 111–36.
107. Rivera-Sylva HE, Rosa RR-dl, Ortiz-Mendieta JA. A review of the dinosaur record from Mexico. In: Vega FJ, Nyborg TG, Perrilliat MdC, Montellano-Ballesteros M, Cevallos-Ferriz SRS, Quiroz-Barroso SA, editors. *Studies on Mexican Paleontology*. Dordrecht: Springer; 2006.
108. Bell PR, Evans DC. Revision of the status of *Saurolophus* (Hadrosauridae) from California, USA. *Canadian Journal of Earth Sciences*. 2010; 47:1417–26.
109. Bullard T. A dinosaur from the Nanaimo Group. *British Columbia Palaeontological Alliance Newsletter*. 1999; 22:11.
110. Nicholls EL, Meckert D. Marine reptiles from the Nanaimo Group (Upper Cretaceous) of Vancouver Island. *Canadian Journal of Earth Sciences*. 2002; 39:1591–603.
111. Ludvisgen R. Ancient saurian: Cretaceous reptiles of Vancouver Island. In: Ludvisgen R, editor. *Life in stone: A natural history of British Columbia's fossils*. Vancouver: University of British Columbia Press; 1996. p. 156–66.
112. Ludvisgen R, Beard G. *West Coast fossils*. Vancouver: Whitecap Books; 1994.
